# Supplementary material for: Untrasmall Bi2S3 nanodots for in vivo X-ray CT imaging-guided photothermal therapy of cancer
Source: Royal Society of Chemistry journal article supplement (doi:10.1039/c7ra04132b), 2017-01-01
Supplement: c7ra04132b1.pdf [file c7ra04132b1.pdf]

# **Untrasmall Bi<sub>2</sub>S<sub>3</sub> nanodots for in vivo X-ray CT imaging-guided photothermal therapy of cancer**

Zelun Li <sup>#a</sup>, Kelong Ai <sup>#a</sup>, Zhe Yang<sup>b</sup>, Tianqi Zhang<sup>b</sup>, Jianhua Liu<sup>b\*</sup>, Xiaoqiang Cui<sup>a\*</sup>

a State Key Lab Automot Simulat & Control, Dept Mat Sci, Jilin Univ, Changchun 130012, Peoples R China

b Department of Radiology, The Second Hospital of Jilin University, Changchun, 130041 (P. R. China).

\* Corresponding author:

Xiaoqiang Cui

E-mail addresses: xqcui@jlu.edu.cn.

Jianhua Liu

E-mail addresses: drliujh@yahoo.com

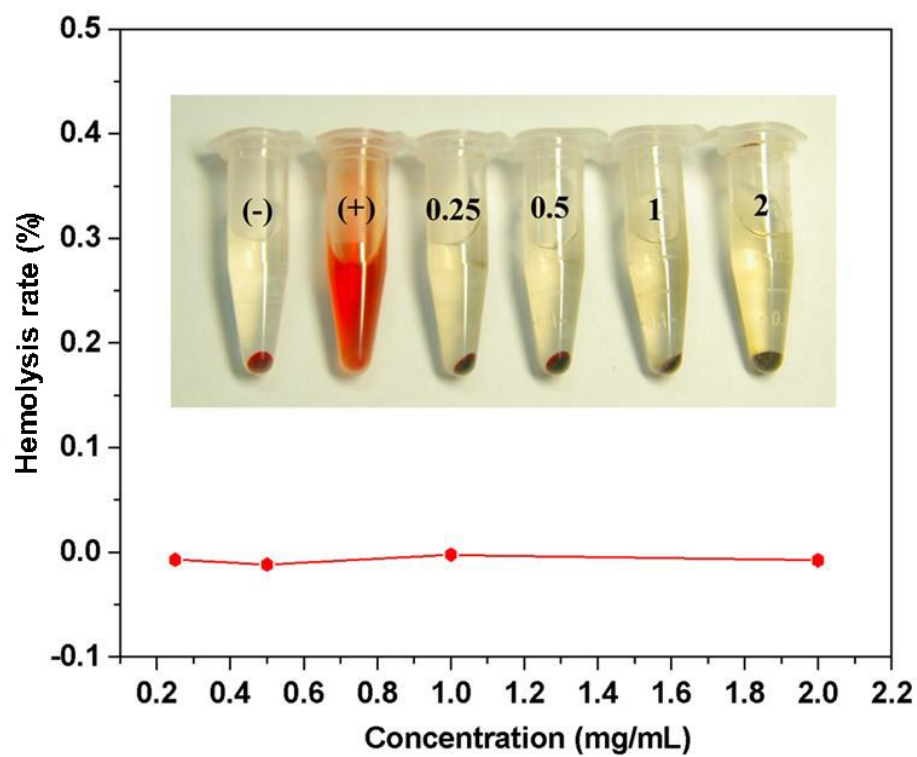

**Fig. S1** Blood hemolysis analysis of PEG-coated  $\text{Bi}_2\text{S}_3$  nanodots. From left to right: water, PBS, 0.25, 0.5, 1, 2 mg/mL PEG-coated  $\text{Bi}_2\text{S}_3$  nanodots dispersed in PBS.

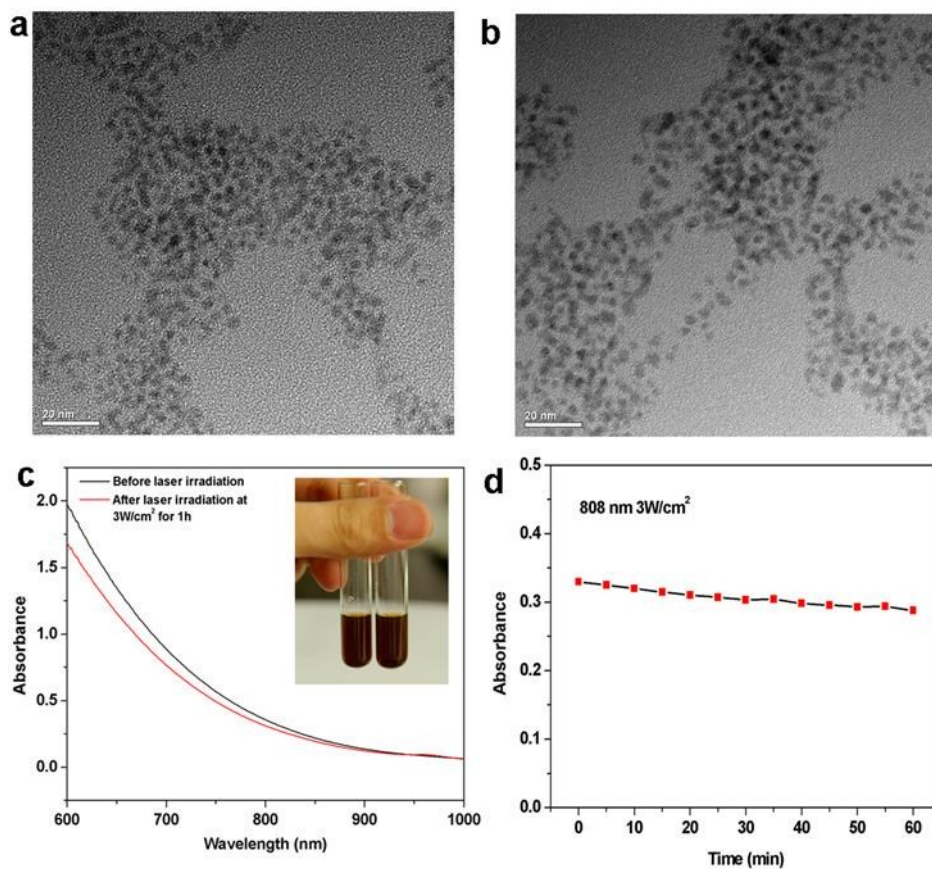

**Fig. S2** TEM images of PEG-coated  $\text{Bi}_2\text{S}_3$  nanodots before (a) and after (b) laser irradiation. (c) UV-vis absorbance of PEG-coated  $\text{Bi}_2\text{S}_3$  nanodots before and after continuous laser irradiation for 1 h. The insert is the corresponding digital picture of PEG-coated  $\text{Bi}_2\text{S}_3$  nanodots (left) before and (right) after laser irradiation. (d) The absorbance of PEG-coated  $\text{Bi}_2\text{S}_3$  nanodots at 808 nm during the laser irradiation. The power density is  $3\text{W/cm}^2$ .

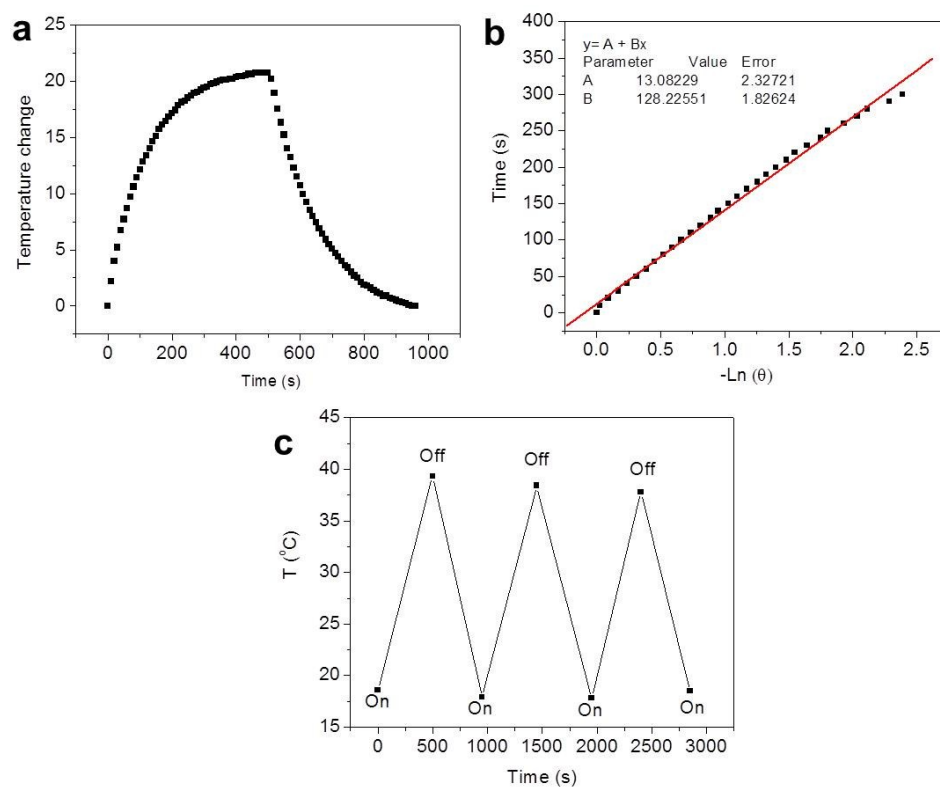

**Fig. S3** (a) The photothermal response of the PEG-Bi<sub>2</sub>S<sub>3</sub> nanodot aqueous solution (148 mg/mL) for 500 s with an NIR laser (808 nm, 3 W/cm<sup>2</sup>) and then the laser was turn off. (b) Linear time data vs.  $-\ln \theta$  derived from the cooling period of a. (c) Photothermal conversion effect of PEG-Bi<sub>2</sub>S<sub>3</sub> nanodots after three laser irradiation and cooling circles.

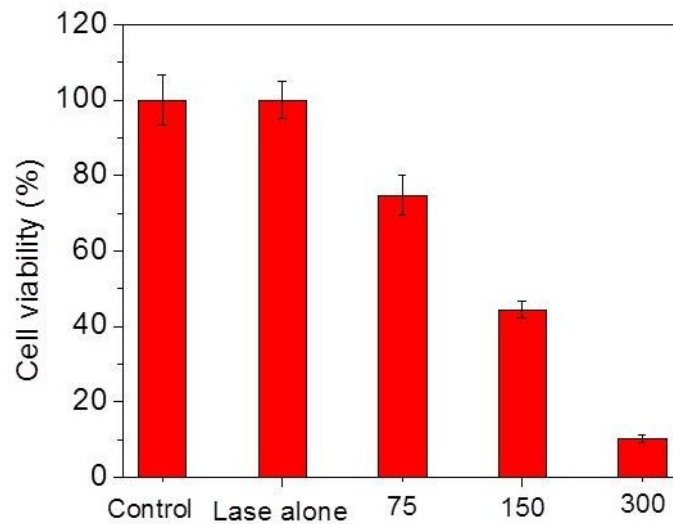

**Fig. S4** Quantitative cell viability analysis 4T1 cells after treatment with PEG-Bi<sub>2</sub>S<sub>3</sub> nanodots with laser irradiation.

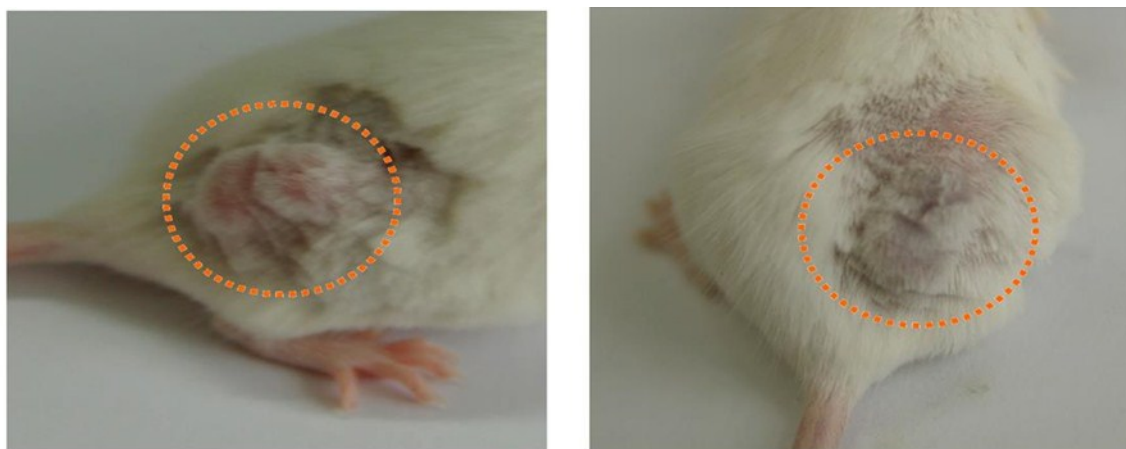

**Fig. S5** Digital pictures (b) of 4T1 tumor-bearing mouse before injection (left) and at 24 h postinjection (right) of PEG-coated Bi<sub>2</sub>S<sub>3</sub> nanodots.

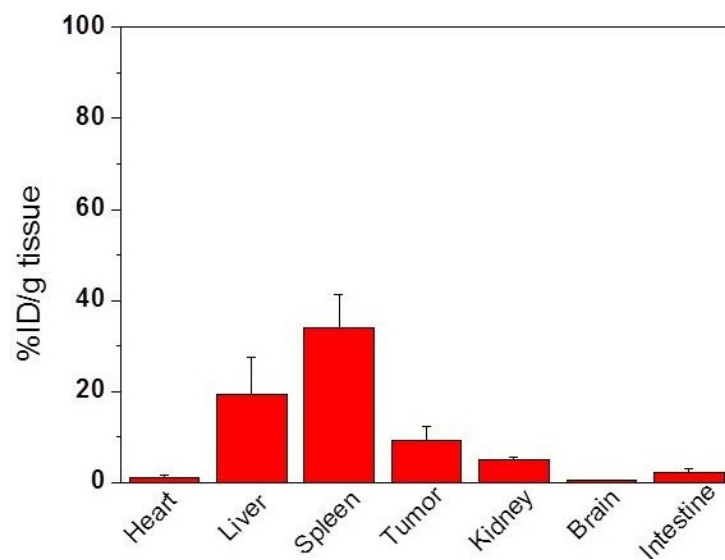

**Fig. S6** Tissue distribution of PEG-coated  $\text{Bi}_2\text{S}_3$  nanodots at 24 h postinjection through the tail vein based on the ICP analysis.

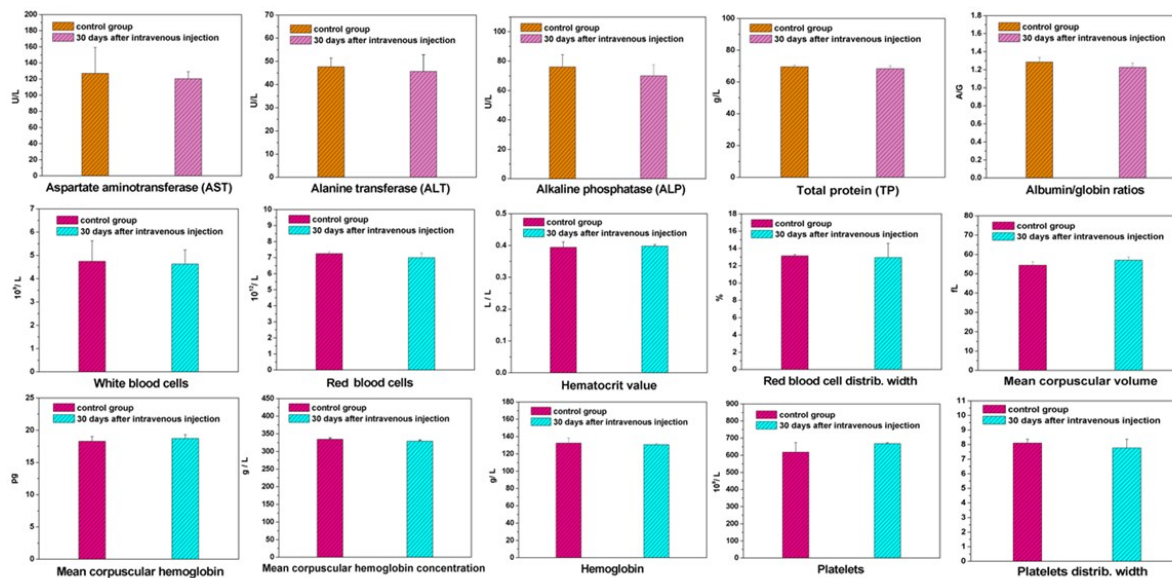

**Fig. S7** Blood analysis of control mice and mice treated with PEG-coated  $\text{Bi}_2\text{S}_3$  nanodots.

**Table S1.** CT values (HU) of the mouse before vs. at different time points after injection of PEG-coated  $\text{Bi}_2\text{S}_3$  nanodots.

| Organ   | Pre-injection | 5 min | 30 min | 1h    | 2h    |
|---------|---------------|-------|--------|-------|-------|
| Heart   | 45.6          | 137.8 | 83.3   | 56.4  | 55.5  |
| Liver   | 42.8          | 85.4  | 132.9  | 151.7 | 170.9 |
| Spleen  | 38.7          | 79.3  | 202.7  | 220.1 | 231.1 |
| Sladder | 29.4          | 47.7  | 93.6   | 65.9  | 35.2  |
